# Supplementary material
Source: PubMed Central journal article supplement (PMC3749366)
Supplement: NIHMS502763-supplement-1.pdf [file NIHMS502763-supplement-1.pdf]

# **Genome-wide search for exonic variants affecting translational efficiency: a pilot study**

## **On-line supplementary material**

Quan Li<sup>1</sup>, Angeliki Makri<sup>1</sup>, Yang Lu<sup>1,2</sup>, Luc Marchand<sup>1</sup>, Rosemarie Grabs<sup>1</sup>, Marylene Rousseau<sup>1</sup>, Houria Ounissi-Benkhalha<sup>1</sup>, Jerry Pelletier<sup>3</sup>, Francis Robert<sup>3</sup>, Eef Harmsen<sup>4</sup>, Thomas J. Hudson<sup>4,5</sup>, Tomi Pastinen<sup>4</sup>, Constantin Polychronakos<sup>1\*</sup> & Hui-Qi Qu<sup>6\*</sup>

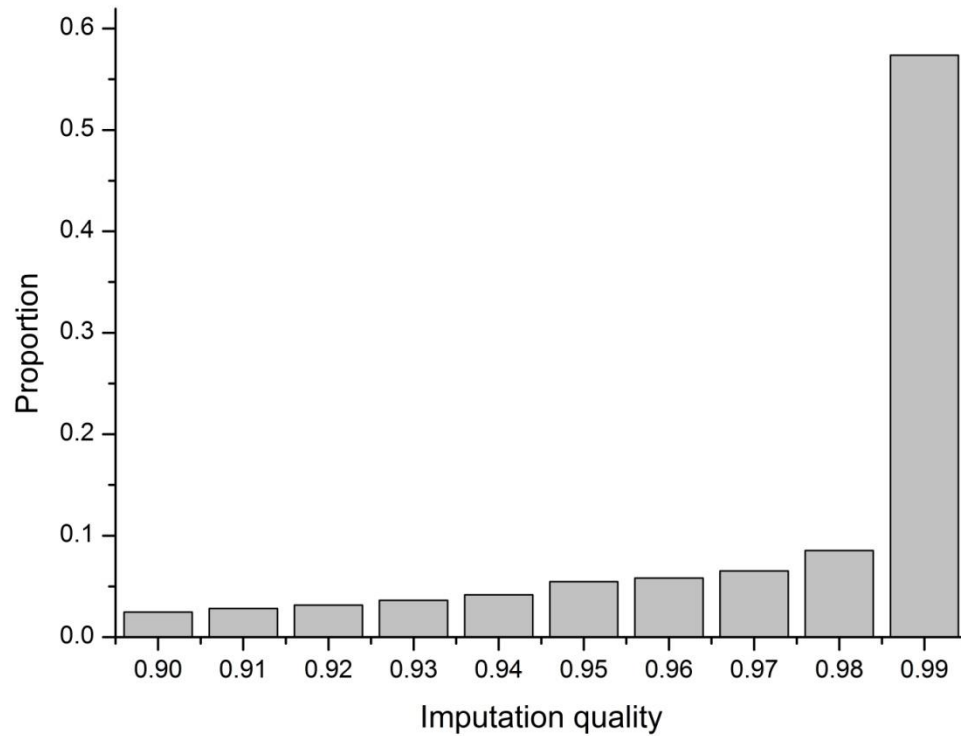

**Supplementary Figure S1** The imputation quality scores of 2,598,418 SNPs genotyped by the 1000 Genome Project in 9 samples of this study. The quality of each SNP's imputation was assessed by the average posterior probability for the most likely genotype. The majority (83.7%) of these imputations have good quality with the scores  $>0.95$ .

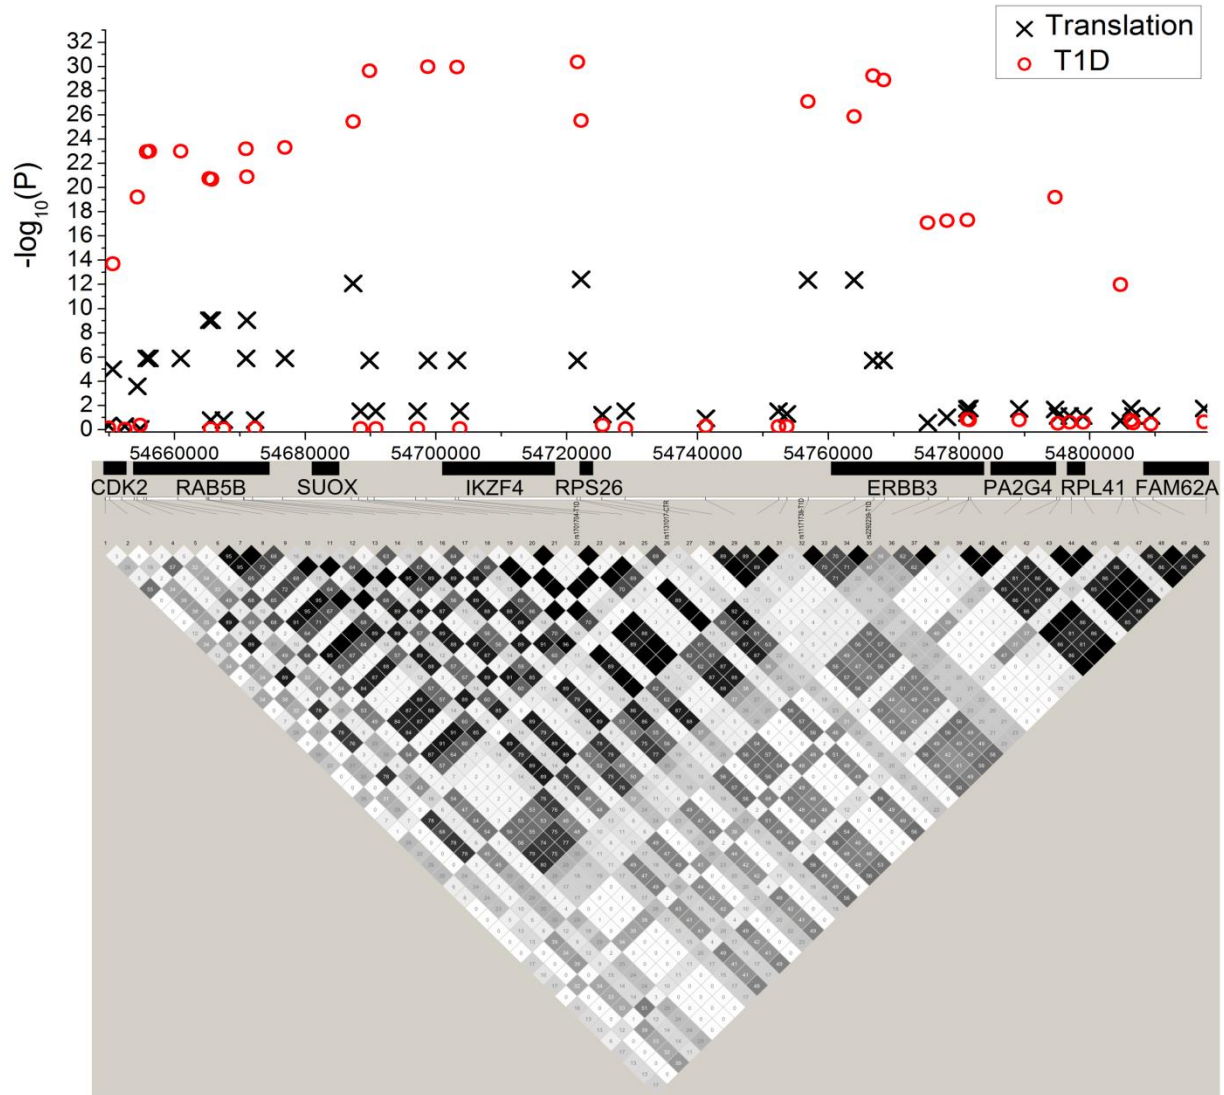

**Supplementary Figure S2** Regional plot of the *RPS26* region at Chr12q13.  $-\log_{10}(P)$ -values of associations with type 1 diabetes (T1D) susceptibility and ribosomal distribution of mRNAs are shown for SNPs in this region. The P-values of T1D associations are from the meta-analysis of six T1D cohorts reported before<sup>55</sup>. The grey scale in the LD map indicates  $r^2$  values.

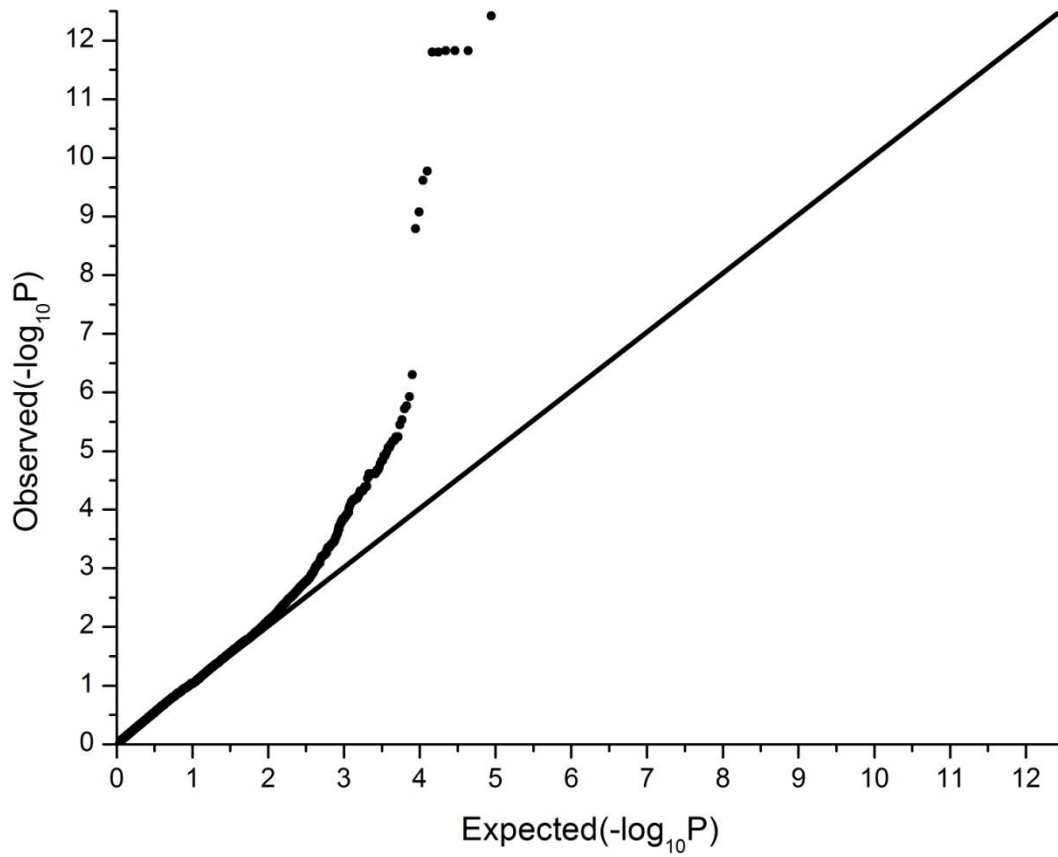

**Supplementary Figure S3** QQ-plot of genome-wide tests for associations of exonic SNPs and the ratio of normalized polysomal/nonpolysomal mRNAs.

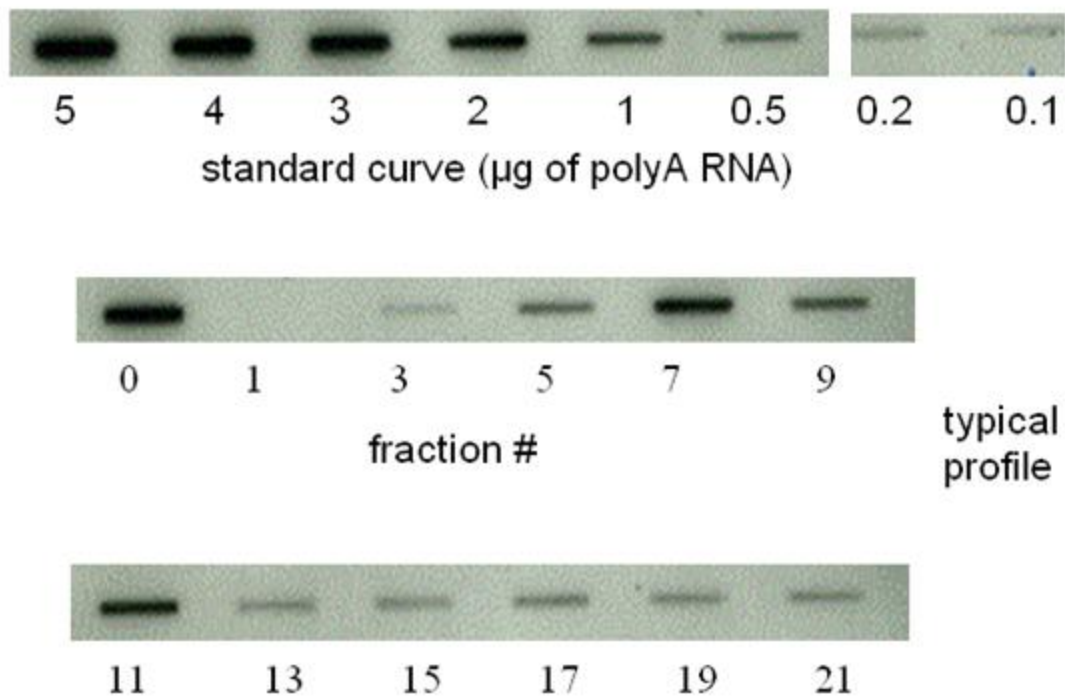

**Supplementary Figure S4** The DIG-labeled oligo-dT assay to quantify fraction poly(A) RNA. The first strip shows unfractionated pancreas Poly(A) RNA at the indicated standard concentrations. The lower two strips, from the same membrane, represent a typical profile of LCLs. The numbers represent ultracentrifugal fractions, and larger numbers represent heavier fractions; “0” represents unfractionated RNA.

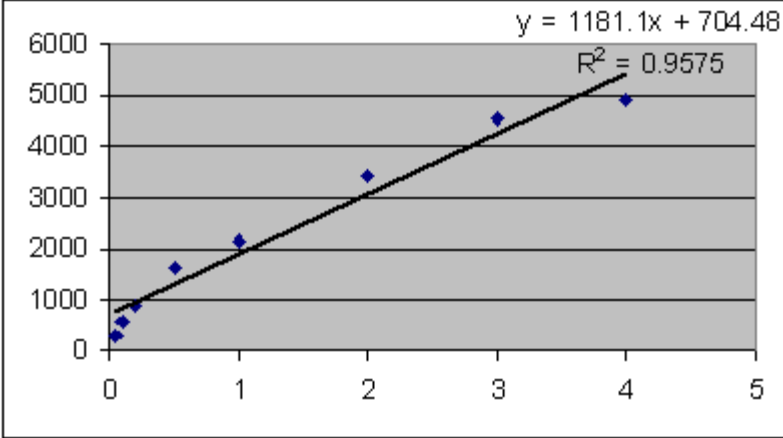

**Supplementary Figure S5** The standard curve of the Poly(A) densitometry quantification. X-axis: Poly(A) concentration (ng/μl); Y-axis: OD value.

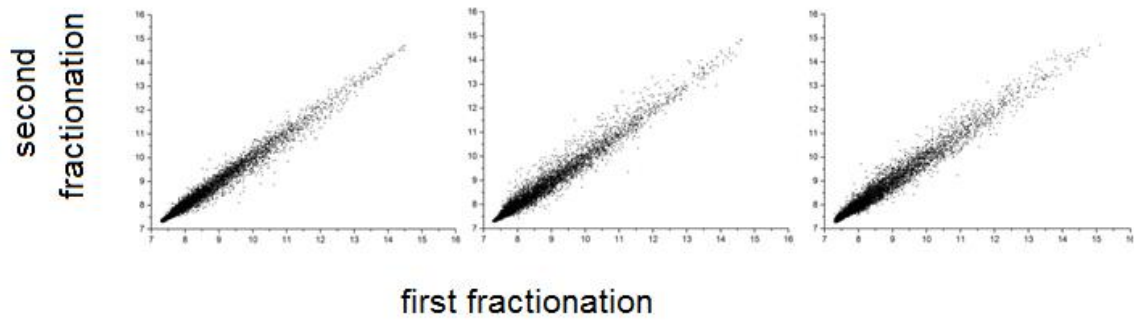

**Supplementary Figure S6 Little random noise introduced by the fractionation.** The Microarray profiling data from two different ultracentrifugal fractionations of the same LCL culture show relatively little random noise introduced by the fractionation. From left to right, it is light fractions, non-fractionated RNAs, and heavy fractions.

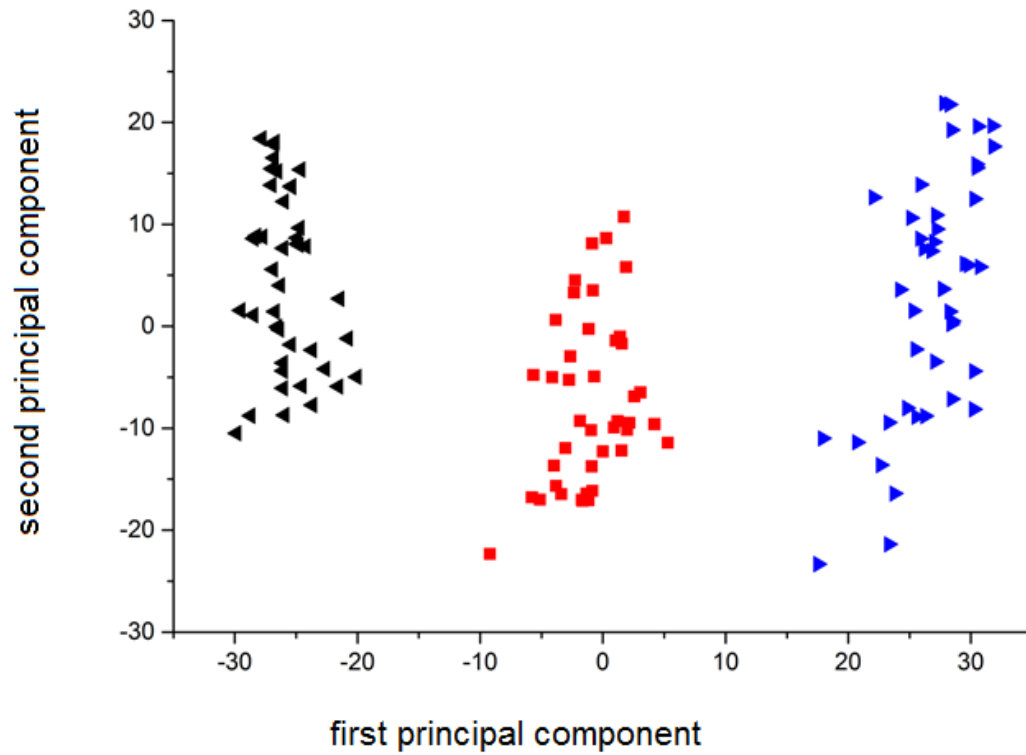

**Supplementary Figure S7 Expression profiles in different fractions.** After data normalization, the Principal Component Analysis (PCA) showed distinctive genome-wide expression profiles in different fractions. Light fractions, non-fractionated RNA, and heavy fractions, can be clearly distinguished by Component 1 (X-axis). From left to right, it is light fractions, non-fractionated RNAs, and heavy fractions.





**Supplementary Table S1 Translational *cis*-regulatory effect of 74 SNPs with Q<0.1**

| SNP            | Function          | Chr | Pos*      | Gene           | MAF   | P-value** | Q-value   |
|----------------|-------------------|-----|-----------|----------------|-------|-----------|-----------|
| rs1131017      | utr-5             | 12  | 54722196  | <i>RPS26</i>   | 0.365 | 3.79E-13  | 2.08E-08  |
| rs2165490      | utr-3             | 12  | 91343130  | <i>CLLU1OS</i> | 0.231 | 1.49E-12  | 2.08E-08  |
| chr12:91347034 | utr-3             | 12  | 91347034  | <i>CLLU1OS</i> | 0.250 | 1.49E-12  | 2.08E-08  |
| rs12578643     | utr-3             | 12  | 91348204  | <i>CLLU1OS</i> | 0.231 | 1.49E-12  | 2.08E-08  |
| rs12580153     | missense          | 12  | 91342613  | <i>CLLU1OS</i> | 0.250 | 1.56E-12  | 2.08E-08  |
| rs12578105     | utr-3             | 12  | 91343830  | <i>CLLU1OS</i> | 0.250 | 1.56E-12  | 2.08E-08  |
| rs139561       | utr-3             | 22  | 40525356  | <i>CCDC134</i> | 0.231 | 1.68E-10  | 1.92E-06  |
| rs1792174      | utr-5             | 11  | 73176581  | <i>MRPL48</i>  | 0.436 | 2.41E-10  | 2.41E-06  |
| rs13876        | utr-3             | 5   | 99949980  | <i>FAM174A</i> | 0.487 | 8.43E-10  | 7.48E-06  |
| rs139562       | utr-5             | 22  | 40526630  | <i>CCDC134</i> | 0.224 | 1.62E-09  | 1.29E-05  |
| rs1334688      | utr-5             | 6   | 155677316 | <i>TFB1M</i>   | 0.449 | 4.96E-07  | 3.60E-03  |
| rs3802755      | utr-3             | 11  | 26639410  | <i>TMEM16C</i> | 0.162 | 1.18E-06  | 7.86 E-03 |
| rs162981       | utr-5             | 6   | 155677277 | <i>TFB1M</i>   | 0.434 | 1.70E-06  | 0.010     |
| rs11553096     | utr-5             | 7   | 75515152  | <i>STYXL1</i>  | 0.154 | 1.91E-06  | 0.011     |
| rs4256900      | utr-5             | 10  | 127501746 | <i>UROS</i>    | 0.421 | 2.95E-06  | 0.016     |
| rs1130538      | utr-3             | 6   | 31344601  | <i>HLA-C</i>   | 0.487 | 3.55E-06  | 0.018     |
| rs3742289      | missense          | 13  | 51501195  | <i>ALG11</i>   | 0.385 | 5.75E-06  | 0.026     |
| rs2897964      | utr-3             | 13  | 51503676  | <i>ALG11</i>   | 0.385 | 5.75E-06  | 0.026     |
| rs1049281      | utr-3             | 6   | 31344546  | <i>HLA-C</i>   | 0.474 | 6.55E-06  | 0.027     |
| rs28420948     | utr-3             | 6   | 31344578  | <i>HLA-C</i>   | 0.487 | 6.83E-06  | 0.027     |
| rs2799680      | utr-3             | 1   | 199641300 | <i>TNNI1</i>   | 0.487 | 7.62E-06  | 0.029     |
| rs3742291      | coding-synonymous | 13  | 51501776  | <i>ALG11</i>   | 0.395 | 8.73E-06  | 0.030     |
| rs2277448      | utr-5             | 13  | 51483549  | <i>ALG11</i>   | 0.395 | 8.73E-06  | 0.030     |

|            |                   |    |           |                 |       |          |       |
|------------|-------------------|----|-----------|-----------------|-------|----------|-------|
| rs16947    | missense          | 22 | 40853887  | <i>C22ORF32</i> | 0.368 | 1.04E-05 | 0.035 |
| rs1807494  | utr-3             | 22 | 40804084  | <i>C22ORF32</i> | 0.378 | 1.19E-05 | 0.037 |
| rs2269524  | utr-5             | 22 | 40805649  | <i>C22ORF32</i> | 0.378 | 1.19E-05 | 0.037 |
| rs10423138 | coding-synonymous | 19 | 63620114  | <i>ZNF584</i>   | 0.250 | 1.44E-05 | 0.041 |
| rs241449   | coding-synonymous | 6  | 32904631  | <i>TAP2</i>     | 0.449 | 1.45E-05 | 0.041 |
| rs2070610  | utr-5             | 21 | 29367819  | <i>CCT8</i>     | 0.128 | 1.64E-05 | 0.045 |
| rs3747240  | utr-3             | 22 | 44118888  | <i>FAM118A</i>  | 0.079 | 1.90E-05 | 0.048 |
| rs6590520  | utr-3             | 11 | 130252596 | <i>SNX19</i>    | 0.244 | 2.10E-05 | 0.048 |
| rs3740714  | utr-5             | 11 | 18390465  | <i>LDHC</i>     | 0.244 | 2.10E-05 | 0.048 |
| rs177252   | coding-synonymous | 5  | 134371698 | <i>CATSPER3</i> | 0.244 | 2.33E-05 | 0.048 |
| rs2857101  | utr-3             | 6  | 32902654  | <i>TAP2</i>     | 0.244 | 2.46E-05 | 0.048 |
| rs241456   | utr-3             | 6  | 32903943  | <i>TAP2</i>     | 0.244 | 2.46E-05 | 0.048 |
| rs241455   | utr-3             | 6  | 32903997  | <i>TAP2</i>     | 0.244 | 2.46E-05 | 0.048 |
| rs241454   | utr-3             | 6  | 32904122  | <i>TAP2</i>     | 0.244 | 2.46E-05 | 0.048 |
| rs241453   | utr-3             | 6  | 32904204  | <i>TAP2</i>     | 0.244 | 2.46E-05 | 0.048 |
| rs17034    | utr-3             | 6  | 32904499  | <i>TAP2</i>     | 0.167 | 2.46E-05 | 0.048 |
| rs241448   | nonsense          | 6  | 32904663  | <i>TAP2</i>     | 0.434 | 2.46E-05 | 0.048 |
| rs241447   | missense          | 6  | 32904729  | <i>TAP2</i>     | 0.308 | 2.46E-05 | 0.048 |
| rs1801311  | missense          | 22 | 40816669  | <i>C22ORF32</i> | 0.333 | 2.79E-05 | 0.053 |
| rs2272836  | coding-synonymous | 22 | 48924677  | <i>MOV10L1</i>  | 0.244 | 2.93E-05 | 0.054 |
| rs103612   | missense          | 9  | 133009913 | <i>NUP214</i>   | 0.333 | 3.95E-05 | 0.070 |
| rs1256945  | utr-3             | 1  | 199642281 | <i>TNNI1</i>    | 0.321 | 4.09E-05 | 0.070 |
| rs1256946  | utr-3             | 1  | 199642374 | <i>TNNI1</i>    | 0.500 | 4.09E-05 | 0.070 |

|            |                   |    |           |                 |       |          |       |
|------------|-------------------|----|-----------|-----------------|-------|----------|-------|
| rs3758144  | utr-3             | 8  | 18432457  | <i>PSD3</i>     | 0.500 | 4.13E-05 | 0.070 |
| rs3751033  | utr-5             | 11 | 130291555 | <i>SNX19</i>    | 0.237 | 4.41E-05 | 0.072 |
| rs3764535  | coding-synonymous | 19 | 63620864  | <i>ZNF584</i>   | 0.462 | 4.80E-05 | 0.072 |
| rs3764534  | coding-synonymous | 19 | 63620948  | <i>ZNF584</i>   | 0.462 | 4.80E-05 | 0.072 |
| rs3764533  | utr-3             | 19 | 63621006  | <i>ZNF584</i>   | 0.462 | 4.80E-05 | 0.072 |
| rs1051500  | utr-3             | 19 | 63636214  | <i>ZNF584</i>   | 0.462 | 4.80E-05 | 0.072 |
| rs1465789  | missense          | 19 | 63637868  | <i>ZNF584</i>   | 0.462 | 4.80E-05 | 0.072 |
| rs241441   | coding-synonymous | 6  | 32905275  | <i>TAP2</i>     | 0.447 | 4.88E-05 | 0.072 |
| rs241451   | utr-3             | 6  | 32904458  | <i>TAP2</i>     | 0.269 | 5.48E-05 | 0.080 |
| rs28381589 | utr-3             | 6  | 32904433  | <i>TAP2</i>     | 0.211 | 5.67E-05 | 0.081 |
| rs9398218  | coding-synonymous | 6  | 110252996 | <i>FIG4</i>     | 0.487 | 5.97E-05 | 0.081 |
| rs1130838  | missense          | 6  | 31345103  | <i>HLA-C</i>    | 0.461 | 6.34E-05 | 0.081 |
| rs35708511 | missense          | 6  | 31345141  | <i>HLA-C</i>    | 0.461 | 6.34E-05 | 0.081 |
| rs1050180  | missense          | 6  | 31345812  | <i>HLA-C</i>    | 0.461 | 6.34E-05 | 0.081 |
| rs1050716  | missense          | 6  | 31346209  | <i>HLA-C</i>    | 0.461 | 6.34E-05 | 0.081 |
| rs1094     | utr-3             | 6  | 31344701  | <i>HLA-C</i>    | 0.408 | 6.67E-05 | 0.081 |
| rs4716399  | coding-synonymous | 6  | 169918572 | <i>C6ORF70</i>  | 0.408 | 6.69E-05 | 0.081 |
| rs139299   | missense          | 22 | 37827400  | <i>APOBEC3H</i> | 0.408 | 6.72E-05 | 0.081 |
| rs139297   | missense          | 22 | 37827350  | <i>APOBEC3H</i> | 0.333 | 6.72E-05 | 0.081 |
| rs139302   | missense          | 22 | 37827984  | <i>APOBEC3H</i> | 0.282 | 6.72E-05 | 0.081 |
| rs7767581  | utr-5             | 6  | 31347834  | <i>HLA-C</i>    | 0.457 | 7.14E-05 | 0.083 |
| rs3087804  | utr-3             | 15 | 81476777  | <i>BTBD1</i>    | 0.276 | 7.19E-05 | 0.083 |
| rs13501    | utr-3             | 6  | 32901501  | <i>TAP2</i>     | 0.500 | 7.23E-05 | 0.083 |

|           |          |    |           |              |       |          |       |
|-----------|----------|----|-----------|--------------|-------|----------|-------|
| rs3825528 | utr-5    | 13 | 51500920  | <i>ALG11</i> | 0.449 | 7.26E-05 | 0.083 |
| rs2071470 | utr-5    | 6  | 32892731  | <i>TAP2</i>  | 0.289 | 7.93E-05 | 0.089 |
| rs1256947 | utr-3    | 1  | 199642436 | <i>TNNI1</i> | 0.487 | 8.08E-05 | 0.090 |
| rs7154785 | utr-3    | 14 | 23966670  | <i>CBLN3</i> | 0.171 | 8.36E-05 | 0.091 |
| rs2229642 | missense | 6  | 33767450  | <i>ITPR3</i> | 0.408 | 9.01E-05 | 0.097 |

---

\* Human genome HG18 build; \*\* Spearman rank correlation *P* values.

**Supplementary Reference:**

55. Bradfield, J.P. et al. A genome-wide meta-analysis of six type 1 diabetes cohorts identifies multiple associated loci. *PLoS Genet.* **7**, e1002293 (2011).
